# Supplementary material for: Agricultural Practices and Soil and Water Conservation in the Transboundary Region of Kenya and Uganda: Farmers’ Perspectives of Current Soil Erosion
Source: MDPI journal article supplement (doi:10.3390/agriculture13071434), 2023-07-20
Supplement: s1 [file s1]

## Supplementary S1: Questionnaire

Questionnaire Identification Number   /  /  /  /  /  /  /  /  

### Part A: Respondent's Identification/Background

|              |       |         |
|--------------|-------|---------|
| Country      | _____ | CCODE   |
| District     | _____ | DICODE  |
| County       | _____ | COUCODE |
| Sub Country  | _____ | SCOCODE |
| Division     | _____ | DIVCODE |
| Location     | _____ | LOCCODE |
| Ward         | _____ | WARDID  |
| Sub Location | _____ | SLCODE  |
| Household    | _____ | HHCODE  |

Having read the informed consent form, would you like to participate in this interview?

[    ] 1 =Yes    [    ] 0 = No

Would you like to be anonymous?

[    ] 1 =Yes    [    ] 0 = No

(If yes, proceed to the type of household part if no enter the respondent name)

Respondent's Name: \_\_\_\_\_ Relationship with the farm owner \_\_\_\_\_ (see codes for A)

Who makes decisions related to the crops in the farming systems \_\_\_\_\_ (see codes for A)

Contact mobile phone No of the respondent \_\_\_\_\_

Name of Household Head \_\_\_\_\_ (if different from the respondent)

Interviewer's Name \_\_\_\_\_ Date of Interview \_\_\_\_\_

Language used in interview \_\_\_\_\_

GPS coordinates of residence:

NORTH: \_\_\_\_\_ EAST: \_\_\_\_\_ ALTITUDE (m.a.s.l.): \_\_\_\_\_

**Type of household**

1. In which year did the household start farming? \_\_\_\_\_
2. What type of farm is it? \_\_\_\_\_
3. Are you a member of a farmer group or association? [     ] 1 =Yes [     ] 0 = No
4. In how many group/association are you a member? \_\_\_\_\_
5. For group/association with the longest membership, how long have you been a member? \_\_\_\_\_ Years
6. Is soil erosion present in your farm [     ] 1 =Yes [     ] 0 = No
7. Have you participated in any land management or soil and water conservation related collective action during the last 12 months? [     ] 1 =Yes [     ] 0 = No
8. How many Parcels do you have (See definition of a field below)
9. What are the sizes of your 3 main Parcels

Parcel 1 \_\_\_\_\_

Parcel 2 \_\_\_\_\_

Parcel 3 \_\_\_\_\_

A PARCEL is a continuous and separate piece of land of any shape that is under same ownership and tenure system

If more than one we are interested in the three major ones that the farmer has!

|                        |                   |                                                        |  |
|------------------------|-------------------|--------------------------------------------------------|--|
| Codes for part A       | 8. Fostered child | Codes 2                                                |  |
| 1. Household head      | 9. Hired worker   | 1. Subsistence                                         |  |
| 2. Spouse              |                   | 2. Cash Crop Farming                                   |  |
| 3. Son/daughter        |                   | 3. Livestock Farming                                   |  |
| 4. Parent              |                   | 4. Subsistence + Cash Crop Farming                     |  |
| 5. Son/daughter in-law |                   | 5. Subsistence + Livestock Farming                     |  |
| 6. Grand child         |                   | 6. Subsistence + Cash Crop Farming + Livestock Farming |  |
| 7. Other relative      |                   | 7. Other relative                                      |  |

## Part B. Crops grown and Land use and management

**B1.** Total area of owned farm land (hectares) \_\_\_\_\_

**Definitions:** *A PARCEL is a continuous and separate piece of land of any shape that is under same ownership and tenure system*

*A PLOT is a subunit (crop garden, fallow, woodlot, etc.) within a parcel under the same management*

**B2.** Total number of separate parcels you operated in the last 12 months \_\_\_\_\_

**B3.** During the second season of 2017 (September 2017-January 2018) was the number of PLOTS per PARCEL the same as in the first season of 2017 (February 2017 – June/July 2017)? 1= Yes, 0= No \_\_\_\_\_ :**If**

**Yes, fill in only Table B5i and skip Table B6i, otherwise fill both Tables**

**B4.** How many different crops does your household normally grow during the first season (February 2017 – June 2017)? \_ and during second season (September 2017 – January 2018)? \_\_\_\_\_

The homestead will be used as a reference point. Assign each parcel a name (preferably suggested by the farmer, e.g., Valley) and an ID according to the House Hold Code. Each plot will be entered in separate row, in this case 3 rows would be used for this one parcel. Do the same for all parcels.

Consider only 3 main intercrops if you encounter more than 3 crops on a plot. **For intercrops, record information on main crop first, then put intercrop(s) in the next row(s) and make sure that PID and PLID are EXACTLY the same**

[illegible]

**CEREALS:** 01 = Maize; 2 = Sorghum; 3 = Millet; 4 = Rice; 5 = Teff; 6=Wheat. **TUBERS & ROOTS:** 7 = Cassava; 8 = Sweet potatoes; 9 = Irish potatoes; 10 = Yams; 11 = Carrots. **LEGUMES:** 12 = Beans; 13 = Groundnuts; 14 = Soyabeans; 15 = Pigeon Peas; 16 = Green grams; 17 = Cowpeas. **VEGETABLES:** 18 = Cabbage; 19 = Kale; 20 = Amaranth; 21 = Other green leafy vegetables; 22 = Onions; 23 = Green peppers; 24 = Eggplants; 25 = Chilies; 26 = Mushrooms; 27 = Okra. **FRUITS:** 28= Sweet Bananas; 29 = Banana; 30 = Tomatoes; 31= Orange; 32 = Avocado; 33 = Pineapple; 34 = Pumpkin; 35 = Mango; 36 = Papaya; 37 = Lemon trees; 38 = Watermelon; 39 = Passion fruit; 40 = Jackfruit. **SPICES:** 41 = Ginger; 42 = Cardamon; 43 = Chilies; 44 = Lemongrass; 45= Black pepper. **TREES/EXPORT CROPS:** 46 = Coffee; 47 = Cotton; 48 = Cocoa; 49 = Timber; 50 = Palm trees (for palm oil); 51 = Fuelwood trees; 52 = fodder; 53 = Sugarcane; 54 = Tobacco; 55 = Tea; 56: Others: specify

**Codes for organic input B15:** 1= Crop residues; 2= Animal manure; 3= Compost; 4 =Natural fallow; 5 =Improved fallow; 6 =Legume cover crop; 7 =Biomass transfer; 8=Agroforestry; 9=Household refuse, 10= Other (specify) \_\_\_\_\_

**Major agronomic practices (A PART FROM land preparation and weeding) B18:** 1= Row planting, 2= Plant spacing, 3= Mulching, 4= Thinning/desuckering, 5= Pruning 6=Minimum tillage/zero tillage, 7= other specify

**Stress/ pest /disease incidence on field B19:** 0. No stress; 1. Insect pests; 2. Diseases; 3. Water logging; 4. Drought; 5. Rodents; 6. Low soil fertility; 7.. Other, specify.....



**Part Ci. Input Use for All Crops Grown by the Household during first season of 2017 (February 2017 – June 2017).**

Consider only 3 main intercrops if you encounter more than 3 crops on a plot. **For intercrops, record information on main crop first, then put intercrop(s) in the next row(s) and make sure that PID and PLID are EXACTLY the same**

| Parcel name | Parcel ID | Plot ID | Crop(s) grown<br>(Crop codes C1) | Crop area (ha) | Cropping system<br>1 = monocropping<br>2 = Intercropping | Crop variety: 1 = Local<br>2 = Improved | Percent of area under<br>main crop in intercrop<br>(e.g. 50%) | Principle decision maker<br>& manager<br>Use codes for part A | Type of Inorganic<br>Fertilizer 1 used<br>(codes C7). | Quantity of fertilizer<br>1 (kg) in C7 | Type of Inorganic<br>Fertilizer 2 used<br>(codes C9). | Quantity of fertilizer<br>2 (kg) in C9 | Type of organic inputs<br>(codes C11) | Quantity of organic<br>inputs used (dry form<br>equiv.). (kg) | Frequency of use of<br>organic inputs (see codes<br>C13) | MAJOR practices (up<br>to 3, separated by<br>comma) see codes<br>C14) | Are you affected by pest<br>/disease on the field (Code<br>C15) | Use of crop residues after<br>harvest (codes C16) | Total harvest |                         |
|-------------|-----------|---------|----------------------------------|----------------|----------------------------------------------------------|-----------------------------------------|---------------------------------------------------------------|---------------------------------------------------------------|-------------------------------------------------------|----------------------------------------|-------------------------------------------------------|----------------------------------------|---------------------------------------|---------------------------------------------------------------|----------------------------------------------------------|-----------------------------------------------------------------------|-----------------------------------------------------------------|---------------------------------------------------|---------------|-------------------------|
|             |           |         |                                  |                |                                                          |                                         |                                                               |                                                               |                                                       |                                        |                                                       |                                        |                                       |                                                               |                                                          |                                                                       |                                                                 |                                                   | Dry (kg)      | Fresh/<br>Green<br>(kg) |
| PName       | PID       | PLID    | C1                               | C2             | C3                                                       | C4                                      | C5                                                            | C6                                                            | C7                                                    | C8                                     | C9                                                    | C10                                    | C11                                   | C12                                                           | C13                                                      | C14                                                                   | C15                                                             | C16                                               | C17           | C18                     |
|             |           |         |                                  |                |                                                          |                                         |                                                               |                                                               |                                                       |                                        |                                                       |                                        |                                       |                                                               |                                                          |                                                                       |                                                                 |                                                   |               |                         |
|             |           |         |                                  |                |                                                          |                                         |                                                               |                                                               |                                                       |                                        |                                                       |                                        |                                       |                                                               |                                                          |                                                                       |                                                                 |                                                   |               |                         |
|             |           |         |                                  |                |                                                          |                                         |                                                               |                                                               |                                                       |                                        |                                                       |                                        |                                       |                                                               |                                                          |                                                                       |                                                                 |                                                   |               |                         |
|             |           |         |                                  |                |                                                          |                                         |                                                               |                                                               |                                                       |                                        |                                                       |                                        |                                       |                                                               |                                                          |                                                                       |                                                                 |                                                   |               |                         |
|             |           |         |                                  |                |                                                          |                                         |                                                               |                                                               |                                                       |                                        |                                                       |                                        |                                       |                                                               |                                                          |                                                                       |                                                                 |                                                   |               |                         |
|             |           |         |                                  |                |                                                          |                                         |                                                               |                                                               |                                                       |                                        |                                                       |                                        |                                       |                                                               |                                                          |                                                                       |                                                                 |                                                   |               |                         |
|             |           |         |                                  |                |                                                          |                                         |                                                               |                                                               |                                                       |                                        |                                                       |                                        |                                       |                                                               |                                                          |                                                                       |                                                                 |                                                   |               |                         |
|             |           |         |                                  |                |                                                          |                                         |                                                               |                                                               |                                                       |                                        |                                                       |                                        |                                       |                                                               |                                                          |                                                                       |                                                                 |                                                   |               |                         |
|             |           |         |                                  |                |                                                          |                                         |                                                               |                                                               |                                                       |                                        |                                                       |                                        |                                       |                                                               |                                                          |                                                                       |                                                                 |                                                   |               |                         |
|             |           |         |                                  |                |                                                          |                                         |                                                               |                                                               |                                                       |                                        |                                                       |                                        |                                       |                                                               |                                                          |                                                                       |                                                                 |                                                   |               |                         |
|             |           |         |                                  |                |                                                          |                                         |                                                               |                                                               |                                                       |                                        |                                                       |                                        |                                       |                                                               |                                                          |                                                                       |                                                                 |                                                   |               |                         |
|             |           |         |                                  |                |                                                          |                                         |                                                               |                                                               |                                                       |                                        |                                                       |                                        |                                       |                                                               |                                                          |                                                                       |                                                                 |                                                   |               |                         |
|             |           |         |                                  |                |                                                          |                                         |                                                               |                                                               |                                                       |                                        |                                                       |                                        |                                       |                                                               |                                                          |                                                                       |                                                                 |                                                   |               |                         |
|             |           |         |                                  |                |                                                          |                                         |                                                               |                                                               |                                                       |                                        |                                                       |                                        |                                       |                                                               |                                                          |                                                                       |                                                                 |                                                   |               |                         |

**Code for crops grown: C1:**

**CEREALS:** 01 = Maize; 2 = Sorghum; 3 = Millet; 4 = Rice; 5 = Teff; 6 = Wheat. **TUBERS & ROOTS:** 7 = Cassava; 8 = Sweet potatoes; 9 = Irish potatoes; 10 = Yams; 11 = Carrots. **LEGUMES:** 12 = Beans; 13 = Groundnuts; 14 = Soyabeans; 15 = Pigeon Peas; 16 = Green grams; 17 = Cowpeas. **VEGETABLES:** 18 = Cabbage; 19 = Kale; 20 = Amaranth; 21 = Other green leafy vegetables; 22 = Onions; 23 = Green peppers; 24 = Eggplants; 25 = Chilies; 26 = Mushrooms; 27 = Okra. **FRUITS:** 28 = Sweet Bananas; 29 = Banana; 30 = Tomatoes; 31 = Orange; 32 = Avocado; 33 = Pineapple; 34 = Pumpkin; 35 = Mango; 36 = Papaya; 37 = Lemon trees; 38 = Watermelon; 39 = Passion fruit; 40 = Jackfruit. **SPICES:** 41 = Ginger; 42 = Cardamon; 43 = Chilies; 44 = Lemongrass; 45 = Black pepper. **TREES/EXPORT CROPS:** 46 = Coffee; 47 = Cotton; 48 = Cocoa; 49 = Timber; 50 = Palm trees (for palm oil); 51 = Fuelwood trees; 52 = fodder; 53 = Sugarcane; 54 = Tobacco; 55 = Tea; 56: Others: specify

**Code for fertilizers: add possible combination C7 & C9:** 0: No fertilizer; 1=Diammonium Phosphate (DAP); 2=UREA; 3=NPK; 4=Calcium Ammonium nitrate (CAN); 5=MonoAmmonium Phosphate (MAP); 6=Triple Super phosphate (TSP); 7=Single superphosphate (SSP); 8=Other (Specify) \_\_\_\_\_

**Codes for organic input C11:** 1= Crop residues; 2= Animal manure; 3= Compost; 4 =Natural fallow; 5 =Improved fallow; 6 =Legume cover crop; 7 =Biomass transfer; 8=Agroforestry; 9=Household refuse, 10= Other (specify) \_\_\_\_\_

**Codes on frequency of organic input application C13:** 1=every cropping season; 2=major cropping season only; 3=Minor cropping season only; 4=other (specify) \_\_\_\_\_

**Major agronomic practices (A PART FROM land preparation and weeding) C14:** 1= Row planting, 2= Plant spacing, 3= Mulching, 4= Thinning/desuckering, 5= Pruning 6=Minimum tillage/zero tillage, 7= other specify

**Stress/ pest /disease incidence on field C15:** 0. No stress; 1. Insect pests; 2. Diseases; 3. Water logging; 4. Drought; 5. Rodents; 6. Low soil fertility; 7.. Other, specify.....



#### D: Other information on crop rotations and management practices

1. What crop rotations are applied to different by this household? Specify the recent crop rotations cultivated by the household starting with the current crop.

Each plot from the parcel will be entered in a separate row, but with the same parcel ID. Do the same for all parcels. The Parcel ID's and plot ID's should match those from Part B and C

[illegible]

**Code for crops grown: D1:**

**CEREALS:** 01 = Maize; 2 = Sorghum; 3 = Millet; 4 = Rice; 5 = Teff; 6=Wheat. **TUBERS & ROOTS:** 7 = Cassava; 8 = Sweet potatoes; 9 = Irish potatoes; 10 = Yams; 11 = Carrots. **LEGUMES:** 12 = Beans; 13 = Groundnuts; 14 = Soyabeans; 15 = Pigeon Peas; 16 = Green grams; 17 = Cowpeas. **VEGETABLES:** 18 = Cabbage; 19 = Kale; 20 = Amaranth; 21 = Other green leafy vegetables; 22 = Onions; 23 = Green peppers; 24 = Eggplants; 25 = Chilies; 26 = Mushrooms; 27 = Okra. **FRUITS:** 28= Sweet Bananas; 29 = Banana; 30 = Tomatoes; 31= Orange; 32 = Avocado; 33 = Pineapple; 34 = Pumpkin; 35 = Mango; 36 = Papaya; 37 =





**Codes for reason condition (Dvii):** 1= Before short rainfall starts; 2= After short rainfall ends; 3= Before long rainfall starts 4 = After long rainfall ends; 5 = During dry period 6 = Other (specify)\_\_\_\_\_

**Example Field**

| Parcel ID<br>(as in<br>Table D1) |  | Plot ID | Date  | Operation<br>(see codes Dii) | Type                        |                               |                               |                                 |                             | Reason (see<br>codes Dvii)             |
|----------------------------------|--|---------|-------|------------------------------|-----------------------------|-------------------------------|-------------------------------|---------------------------------|-----------------------------|----------------------------------------|
|                                  |  |         |       |                              | Crop type (see codes<br>Di) | Equipment (see codes<br>Diii) | Fertilizer (see codes<br>Div) | Organic Input<br>(see codes Dv) | Quantity (see<br>codes Dvi) |                                        |
| PID                              |  | PLID    |       | Dii                          | Di                          | Diii                          | Div                           | Dv                              | Dvi                         | Dvii                                   |
|                                  |  |         | 10/08 | 6 (Tillage)                  |                             | Oxen plough (2)               |                               |                                 |                             | Before short rain<br>season starts (1) |
|                                  |  |         | 12/08 | 3 (Fertilizer)               |                             |                               |                               | Manure (2)                      | 25 kg/ha (1)                | After long<br>rainfall ends (4)        |
|                                  |  |         | 12/08 | 1 (Planting)                 | Maize (1)                   |                               |                               |                                 |                             | During dry<br>period (5)               |
|                                  |  |         | 05/10 | 3 (Fertilizer)               |                             |                               |                               | Manure (2)                      | 25 kg/ha (1)                |                                        |
|                                  |  |         | 22/11 | (Harvest/Remove)<br>5        |                             |                               |                               |                                 |                             |                                        |

**E) Changes in cultivation**

1. What has prompted you, in the past 10 years, to grow crops that you previously had not grown on the farm before? (please circle all relevant factors by ranking the following where 1=very important, 2 = medium, and 3=low. If nothing has changed in the past 10 years, tick this box: ☐)

|                                                                  |   |   |   |
|------------------------------------------------------------------|---|---|---|
| Speaking with farmers/neighbors/friends                          | 1 | 2 | 3 |
| Advice from agronomists/experts/government officials             | 1 | 2 | 3 |
| Minimize the risk from crop failure                              | 1 | 2 | 3 |
| Financial factors or incentives (including government subsidies) | 1 | 2 | 3 |
| Market factors (e.g. sale difficulties, changing demands)        | 1 | 2 | 3 |
| Pests, diseases, weeds                                           | 1 | 2 | 3 |
| Climate factors                                                  | 1 | 2 | 3 |
| Access to new information (e.g. production guides, internet)     | 1 | 2 | 3 |
| Access to new technology (e.g. new machines)                     | 1 | 2 | 3 |
| Other (please explain)_____                                      | 1 | 2 | 3 |

2. Do you plan to grow the same crops on your fields in the future?

☐ Yes

☐ No

If **No**, what would you want to change on your farm (see crop codes Di above )



## Supplementary S2: Statistical data for a priori sampling distribution estimation

Table S 2a: Kenya

| District | Subcounty               | Pop.  | Pop. density            | Area               | Area shared        | Pop. in study area | Agr. Households in study area | Number of a priori samples | Weighted Population density |
|----------|-------------------------|-------|-------------------------|--------------------|--------------------|--------------------|-------------------------------|----------------------------|-----------------------------|
| [-]      | [-]                     | [-]   | [Pers/km <sup>2</sup> ] | [km <sup>2</sup> ] | [km <sup>2</sup> ] | [-]                | [-]                           | [-]                        | 453.21                      |
| Bungoma  | Bumula                  | 31917 | 475.9                   | 67.1               | 67.1               | 31917              | 3835                          | 4.7                        | 13.58                       |
| Bungoma  | Cheptais                | 28639 | 282.3                   | 101.4              | 101.4              | 28639              | 3842                          | 5.9                        | 12.19                       |
| Bungoma  | Chepyuk                 | 25329 | 113.5                   | 223.2              | 60.4               | 6849               | 875                           | 2.6                        | 2.91                        |
| Bungoma  | Cheskaki                | 23874 | 187.9                   | 127.1              | 127.1              | 23874              | 3130                          | 6.3                        | 10.16                       |
| Bungoma  | Kabuchai / Chwele       | 35395 | 679.7                   | 52.1               | 10.2               | 6908               | 662                           | 0.8                        | 2.94                        |
| Bungoma  | Kabula                  | 20704 | 490.1                   | 42.2               | 25.9               | 12671              | 1213                          | 1.7                        | 5.39                        |
| Bungoma  | Kapkateny               | 28628 | 296.5                   | 96.5               | 7.3                | 2171               | 308                           | 0.4                        | 0.92                        |
| Bungoma  | Khalaba (Kanduyi)       | 23951 | 2654.5                  | 9.0                | 0.7                | 1817               | 51                            | 0.1                        | 0.77                        |
| Bungoma  | Khasoko                 | 13073 | 516.9                   | 25.3               | 25.3               | 13073              | 1323                          | 1.7                        | 5.56                        |
| Bungoma  | Kimaeti                 | 36520 | 545.1                   | 67.0               | 67.0               | 36520              | 4381                          | 5.1                        | 15.54                       |
| Bungoma  | Lwandanyi               | 39776 | 464.0                   | 85.7               | 85.7               | 39776              | 5432                          | 6.4                        | 16.93                       |
| Bungoma  | Malakisi/South Kulisiru | 35001 | 435.9                   | 80.3               | 80.3               | 35001              | 4578                          | 5.7                        | 14.90                       |
| Bungoma  | Marakaru                | 19628 | 701.9                   | 28.0               | 17.9               | 12544              | 1727                          | 1.7                        | 5.34                        |
| Bungoma  | Musikoma                | 37663 | 814.8                   | 46.2               | 40.3               | 32852              | 2138                          | 2.7                        | 13.98                       |
| Bungoma  | Namwela                 | 27263 | 594.8                   | 45.8               | 34.2               | 20363              | 2791                          | 3.0                        | 8.67                        |
| Bungoma  | Siboti                  | 32497 | 543.6                   | 59.8               | 59.8               | 32497              | 4890                          | 5.2                        | 13.83                       |
| Bungoma  | South Bukusu            | 23132 | 482.9                   | 47.9               | 47.9               | 23132              | 2741                          | 3.4                        | 9.85                        |
| Bungoma  | Township                | 16976 | 5261.1                  | 3.2                | 2.1                | 10935              | 282                           | 0.3                        | 4.65                        |
| Bungoma  | Tuuti                   | 15373 | 702.1                   | 21.9               | 15.3               | 10711              | 1178                          | 1.3                        | 4.56                        |
| Bungoma  | West Bukusu             | 19965 | 517.3                   | 38.6               | 38.6               | 19965              | 2472                          | 2.9                        | 8.50                        |
| Busia    | Ageng'a Nanguba         | 25354 | 299.2                   | 84.8               | 31.0               | 9273               | 882                           | 1.6                        | 3.95                        |
| Busia    | Amukura Central         | 20736 | 402.3                   | 51.5               | 51.5               | 20736              | 2585                          | 3.4                        | 8.83                        |
| Busia    | Amukura East            | 23309 | 325.2                   | 71.7               | 71.7               | 23309              | 2631                          | 4.1                        | 9.92                        |
| Busia    | Amukura West            | 17419 | 435.8                   | 40.0               | 40.0               | 17419              | 2025                          | 2.7                        | 7.41                        |
| Busia    | Ang'orom                | 25303 | 1160.6                  | 21.8               | 21.8               | 25303              | 815                           | 1.3                        | 10.77                       |
| Busia    | Ang'urai East           | 15199 | 415.5                   | 36.6               | 36.6               | 15199              | 1863                          | 2.4                        | 6.47                        |
| Busia    | Ang'urai North          | 23341 | 416.1                   | 56.1               | 56.1               | 23341              | 3121                          | 3.9                        | 9.93                        |
| Busia    | Ang'urai South          | 20690 | 378.2                   | 54.7               | 54.7               | 20690              | 2808                          | 3.7                        | 8.81                        |
| Busia    | Bukhaya Central         | 18187 | 377.6                   | 48.2               | 48.2               | 18187              | 2519                          | 3.3                        | 7.74                        |
| Busia    | Bukhaya East            | 21654 | 366.1                   | 59.1               | 59.1               | 21654              | 2412                          | 3.5                        | 9.22                        |
| Busia    | Bukhaya North/Walatsi   | 22448 | 366.4                   | 61.3               | 61.3               | 22448              | 3115                          | 4.1                        | 9.55                        |
| Busia    | Bukhaya West            | 32721 | 449.8                   | 72.7               | 72.7               | 32721              | 3150                          | 4.5                        | 13.93                       |
| Busia    | Burumba                 | 24826 | 4976.3                  | 5.0                | 5.0                | 24826              | 269                           | 0.3                        | 10.57                       |
| Busia    | Busibabo                | 11321 | 342.9                   | 33.0               | 33.0               | 11321              | 1615                          | 2.2                        | 4.82                        |
| Busia    | Chakol North            | 18651 | 371.0                   | 50.3               | 50.3               | 18651              | 2294                          | 3.2                        | 7.94                        |
| Busia    | Chakol South            | 31393 | 449.1                   | 69.9               | 69.9               | 31393              | 4389                          | 5.2                        | 13.36                       |
| Busia    | Elugulu                 | 18647 | 448.2                   | 41.6               | 38.3               | 17176              | 2115                          | 2.7                        | 7.31                        |
| Busia    | Kingandole              | 18237 | 564.1                   | 32.3               | 32.1               | 18083              | 1939                          | 2.3                        | 7.70                        |
| Busia    | Malaba Central          | 24109 | 904.0                   | 26.7               | 26.7               | 24109              | 1451                          | 1.8                        | 10.26                       |

|          |                   |       |       |      |      |       |      |     |       |
|----------|-------------------|-------|-------|------|------|-------|------|-----|-------|
| Busia    | Malaba North      | 13711 | 395.7 | 34.7 | 34.7 | 13711 | 1856 | 2.4 | 5.84  |
| Busia    | Malaba South      | 19111 | 409.0 | 46.7 | 46.7 | 19111 | 2757 | 3.4 | 8.13  |
| Busia    | Marachi Central   | 19688 | 471.6 | 41.7 | 30.6 | 14446 | 1594 | 2.1 | 6.15  |
| Busia    | Marachi East      | 20758 | 513.1 | 40.5 | 40.2 | 20641 | 2443 | 2.9 | 8.78  |
| Busia    | Marachi North     | 23573 | 468.0 | 50.4 | 27.0 | 12619 | 1486 | 1.9 | 5.37  |
| Busia    | Marachi West      | 20104 | 536.7 | 37.5 | 17.5 | 9397  | 1053 | 1.3 | 4.00  |
| Busia    | Matayos South     | 30870 | 448.6 | 68.8 | 68.7 | 30839 | 3099 | 4.3 | 13.13 |
| Busia    | Mayenje           | 9142  | 541.7 | 16.9 | 16.9 | 9142  | 716  | 1.0 | 3.89  |
| Busia    | Nambale           | 31816 | 490.1 | 64.9 | 64.9 | 31816 | 2904 | 4.1 | 13.54 |
| Busia    | Namboboto/Nambuku | 28136 | 408.5 | 68.9 | 68.9 | 28136 | 3365 | 4.5 | 11.97 |
| Busia    | Nangina           | 20131 | 400.9 | 50.2 | 48.8 | 19570 | 1588 | 2.7 | 8.33  |
| Kakamega | Kholera           | 28780 | 518.8 | 55.5 | 20.4 | 10584 | 797  | 1.2 | 4.50  |
| Kakamega | Koyonzo           | 35804 | 517.2 | 69.2 | 27.3 | 14115 | 1137 | 1.7 | 6.01  |
| Kakamega | Mayoni            | 30414 | 602.0 | 50.5 | 1.2  | 695   | 62   | 0.1 | 0.30  |
| Kakamega | Namamali          | 31501 | 528.7 | 59.6 | 59.6 | 31495 | 2559 | 3.7 | 13.40 |
| Siaya    | East Ugenya       | 22657 | 237.6 | 95.3 | 0.3  | 80    | 9    | 0.0 | 0.03  |
| Siaya    | North Ugenya      | 16506 | 237.6 | 69.5 | 0.0  | 11    | 1    | 0.0 | 0.00  |
| Siaya    | West Ugenya       | 22351 | 237.6 | 94.1 | 1.6  | 383   | 41   | 0.1 | 0.16  |

5

10

15

Table S 1b: Uganda

| Population | Population density      | Area               | Area shared        | Population in study area | Agr. Households in study area | Number of a priori samples | Weighted Population density |
|------------|-------------------------|--------------------|--------------------|--------------------------|-------------------------------|----------------------------|-----------------------------|
| [-]        | [Pers/km <sup>2</sup> ] | [km <sup>2</sup> ] | [km <sup>2</sup> ] | [-]                      | [-]                           | [-]                        | 517.43                      |
| 6983       | 99.1                    | 70.4               | 48.5               | 4806                     | 1081                          | 2.0                        | 7.14                        |
| 12906      | 211.2                   | 61.1               | 16.8               | 3554                     | 739                           | 0.8                        | 5.28                        |
| 19908      | 373.0                   | 53.4               | 51.1               | 19051                    | 3714                          | 2.9                        | 28.32                       |
| 31935      | 8536.1                  | 3.7                | 3.1                | 26840                    | 6754                          | 2.2                        | 39.89                       |
| 22863      | 6490.1                  | 3.5                | 0.8                | 5266                     | 1255                          | 0.4                        | 7.83                        |
| 17340      | 281.5                   | 61.6               | 1.5                | 411                      | 77                            | 0.1                        | 0.61                        |
| 27540      | 468.2                   | 58.8               | 33.8               | 15826                    | 3053                          | 2.1                        | 23.52                       |
| 29142      | 578.6                   | 50.4               | 19.1               | 11033                    | 2033                          | 1.3                        | 16.40                       |
| 14714      | 373.8                   | 39.4               | 32.1               | 11985                    | 2487                          | 1.9                        | 17.81                       |
| 10865      | 196.7                   | 55.2               | 22.6               | 4438                     | 842                           | 1.0                        | 6.60                        |
| 23377      | 337.2                   | 69.3               | 2.5                | 834                      | 162                           | 0.1                        | 1.24                        |
| 19997      | 457.3                   | 43.7               | 37.1               | 16954                    | 3180                          | 2.2                        | 25.20                       |
| 18628      | 534.4                   | 34.9               | 1.3                | 683                      | 130                           | 0.1                        | 1.02                        |
| 11117      | 83.1                    | 133.7              | 0.5                | 43                       | 8                             | 0.0                        | 0.06                        |
| 23224      | 603.9                   | 38.5               | 33.7               | 20336                    | 3909                          | 2.4                        | 30.23                       |
| 11262      | 821.2                   | 13.7               | 13.7               | 11262                    | 2371                          | 1.2                        | 16.74                       |
| 19498      | 1001.4                  | 19.5               | 19.5               | 19498                    | 3750                          | 1.8                        | 28.98                       |
| 16595      | 1089.1                  | 15.2               | 11.1               | 12050                    | 2361                          | 1.1                        | 17.91                       |
| 19278      | 850.0                   | 22.7               | 22.7               | 19278                    | 3962                          | 2.0                        | 28.65                       |
| 11873      | 477.0                   | 24.9               | 4.7                | 2236                     | 444                           | 0.3                        | 3.32                        |
| 13637      | 269.8                   | 50.5               | 31.2               | 8404                     | 1756                          | 1.6                        | 12.49                       |
| 9148       | 946.9                   | 9.7                | 9.7                | 9148                     | 2038                          | 1.0                        | 13.60                       |
| 20582      | 925.2                   | 22.2               | 9.7                | 8995                     | 1862                          | 0.9                        | 13.37                       |
| 8022       | 227.5                   | 35.3               | 18.4               | 4177                     | 895                           | 0.9                        | 6.21                        |
| 10258      | 716.6                   | 14.3               | 14.3               | 10258                    | 1838                          | 1.1                        | 15.25                       |
| 20160      | 473.1                   | 42.6               | 18.3               | 8645                     | 1602                          | 1.1                        | 12.85                       |
| 17824      | 293.6                   | 60.7               | 32.5               | 9537                     | 1797                          | 1.7                        | 14.17                       |
| 17968      | 1214.2                  | 14.8               | 14.8               | 17968                    | 4551                          | 1.9                        | 26.71                       |
| 19261      | 385.5                   | 50.0               | 45.8               | 17652                    | 3232                          | 2.5                        | 26.24                       |
| 45882      | 399.9                   | 114.7              | 91.3               | 36500                    | 7227                          | 5.3                        | 54.25                       |
| 36526      | 455.0                   | 80.3               | 2.3                | 1064                     | 204                           | 0.1                        | 1.58                        |
| 19073      | 1079.1                  | 17.7               | 8.7                | 9362                     | 2121                          | 1.0                        | 13.92                       |
| 22942      | 1695.8                  | 13.5               | 0.0                | 28                       | 7                             | 0.0                        | 0.04                        |
